# Supplementary material
Source: PubMed Central journal article supplement (PMC5422803)
Supplement: pnas.1618552114.sapp.pdf [file pnas.1618552114.sapp.pdf]

## Supporting Information for Newton *et al.*, “Structural and functional innovations in the real-time evolution of new ( $\beta\alpha$ )<sub>8</sub> barrel enzymes”

The Supporting Information comprises SI Materials and Methods, Figures S1-S4, Tables S1-S2 and SI References.

### SI Materials and Methods

**Molecular biology.** The primers for introducing the D7N mutation into the genes encoding HisA(dup13-15/D10G) and HisA(dup13-15/D10G/G102A/Q24L/V106L) were 5'-CCG GCA TTA AAC TTA ATT GGC GGC ACC GTG GTG CG-3' and 5'-CGC ACC ACG GTG CCG CCA ATT AAG TTT AAT GCC GG-3' (mutated codon underlined).

**Enzyme kinetics.** For HisA and TrpF activity assays, two independently prepared batches of each enzyme were assayed with a range of substrate concentrations; technical triplicates were carried out at each concentration. All assays were at 25°C and the HisA assays were conducted as described previously (1).

The TrpF activity of each enzyme was quantified using a coupled spectrophotometric assay (2). Addition of the downstream enzyme TrpC (indoleglycerol phosphate synthase) allowed TrpF activity to be quantified *via* the formation of the TrpC product indoleglycerol phosphate (InGP), which absorbs strongly at 278 nm ( $\epsilon = 5,590 \text{ M}^{-1} \cdot \text{cm}^{-1}$ ). The TrpC enzyme was from *Pseudomonas aeruginosa* and its purification has been described previously (3). Reaction mixtures contained Tris·HCl pH 7.5 (50 mM), MgCl<sub>2</sub> (4 mM),  $\beta$ -mercaptoethanol (5 mM) and TrpC at 10  $\mu\text{M}$ . TrpD (anthranilate phosphoribosyltransferase; 5  $\mu\text{M}$ ) from *Acinetobacter baylyi* (2) was used to synthesize the labile substrate, PRA, in the cuvette at concentrations from 0 to 2.0 mM, from the corresponding amount of anthranilate (Sigma Chemical Co.) and a 5-fold molar excess of phosphoribosyl pyrophosphate (Sigma Chemical Co.). Where it was not possible to saturate the enzyme with substrate (*i.e.*  $K_M^{\text{PRA}} > 2 \text{ mM}$ ),  $k_{\text{cat}}/K_M$  was estimated from the slope of the regression line when the initial velocity was plotted against the substrate concentration. Controls confirmed that the enzyme with TrpF activity was catalyzing the rate determining step in InGP formation.

**Relative quantification of enzyme expression levels.** The relative expression level of each HisA variant was determined using multiplexed tandem mass tagging. The 11 *S. enterica* strains used in this analysis were constructed previously (4): DA25516; DA25518; DA25520; DA25522; DA25524; DA25530; DA25540; DA25544; DA25568; DA25570; and DA25578. Overnight cultures grown in LB supplemented with 0.2% glucose were diluted 125-fold into the same medium. The cultures were grown to  $OD_{600} = 0.4$  before being chilled in an ice-water bath. The cells were pelleted, washed three times in PBS, and frozen at  $-80^{\circ}\text{C}$ . Sample preparation and relative quantification of peptides by TMT10plex (Thermo Fisher Scientific) was performed by the Proteomics Core Facility at the Sahlgrenska Academy, University of Gothenburg, as described previously (5). Only peptides unique for a given protein were used for relative quantification and ratios were normalized using the protein median. Only peptides that were common between all HisA variants and were detected in all samples in the same 10-plex were used in the analysis.

**Crystallization screening, data collection and refinement.** The HisA mutants were subjected to commercial crystallization screens (JCSG-*plus* HT-96, Structure Screen 1 + 2 HT-96, and Morpheus HT-96), using the vapor diffusion method at  $8^{\circ}\text{C}$  and at room temperature. The protein concentrations used for screening were  $10\text{-}30\text{ mg}\cdot\text{mL}^{-1}$ . Crystallization conditions for each mutant are listed in Table S2. All crystals were cryoprotected in reservoir solution supplemented with 15% glycerol before being vitrified in liquid nitrogen, unless mentioned otherwise in Table S2.

Data were collected at ESRF (Grenoble, France), Diamond Light Source (Didcot, UK) and PETRA (Hamburg, Germany), and processed using XDS (6) and Aimless (7). The structures were solved by molecular replacement using Phaser (8), as described for wild type HisA (1), then rebuilt using Coot (9) and refined with phenix.refine (10). Data and refinement statistics are listed in Table S2.

**NMR experiments.**  $^{15}\text{N}$  Carr-Purcell-Meiboom-Gill (CPMG) (11, 12) relaxation dispersion experiments were recorded for  $^{15}\text{N}$  labeled HisA(dup13-15) and HisA(dup13-15/D10G) at a static magnetic field strength of 14.1 T and a sample temperature of  $25^{\circ}\text{C}$ . The sample conditions for both variants were 0.7 mM protein in 50 mM Tris-HCl pH 7.5, 150 mM  $\text{Na}_2\text{SO}_4$ , 5 mM  $\beta$ -mercaptoethanol, 2 mM  $\text{NaN}_3$ , 10%  $\text{D}_2\text{O}$ . Data sets were obtained with a constant time relaxation delay of  $T = 20$  ms and effective fields,  $\nu_{\text{CPMG}}$ , between 50 and

1000 Hz. In both cases a total of 18 two-dimensional planes, including four duplicate data points and a reference experiment with the relaxation delay omitted, were recorded. The data was processed with NMRPipe (13) and peaks integrated using PINT (14). Effective transverse relaxation rates were calculated as  $R_{2,eff}(\nu_{CPMG}) = \ln(I_0/I(\nu_{CPMG})) / T$  where  $I(\nu_{CPMG})$  is the peak intensity for different effective fields and  $I_0$  is the peak intensity in the reference experiment. Here,  $\nu_{CPMG} = 1/(2\tau_{CP})$ , where  $\tau_{CP}$  is the interval between successive  $180^\circ$  refocusing pulses during the CPMG pulse train. Uncertainties in  $R_{2,eff}(\nu_{CPMG})$  values were estimated from the duplicate measurements. All dispersion data was fitted on a per-residue basis to the Bloch-McConnell equations (15) including or excluding two-site exchange. Conformational dynamics were established by F-tests at a significance level of  $p < 0.01$ , and dispersion sizes were calculated as the difference between the effective transverse relaxation rates at the lowest effective field and in the limit of infinitely fast pulsing.

**Figure S1 (following page).** Overview of structural results arranged according to the evolutionary trajectory (Fig. 1B). Additional structures are at the bottom left. Numbered footnotes refer to the five different crystal forms, as described below. All structures were superposed to the apo crystal structure of wild type HisA (1), which has 231 ordered residues. Structure superpositioning and calculation of the root mean square deviation (RMSD) for the matching  $C_{\alpha}$  atoms was done using the LSQ commands in O (16, 17).

#<sup>1</sup> Space group  $P6_122$ ;  $a = b \approx 87 \text{ \AA}$ ,  $c \approx 122 \text{ \AA}$ ; 1 molecule per asymmetric unit.

Loops 1 and 6 are disordered in this crystal form and loop 5 is involved in crystal packing, preventing formation of the HisA-active conformation even in presence of ProFAR.

#<sup>2</sup> Space group  $P3_121$ ;  $a = b \approx 47 \text{ \AA}$ ,  $c \approx 198 \text{ \AA}$ ; 1 molecule per asymmetric unit.

#<sup>3</sup> Space group  $P6_122$ ;  $a = b \approx 62 \text{ \AA}$ ,  $c \approx 607 \text{ \AA}$ ; 2 molecules per asymmetric unit.

#<sup>4</sup> Space group  $P3_221$ ;  $a = b \approx 61 \text{ \AA}$ ,  $c \approx 393 \text{ \AA}$ ; 3 molecules per asymmetric unit.

#<sup>5</sup> Space group  $P2_12_12_1$ ;  $a \approx 49 \text{ \AA}$ ,  $b \approx 90 \text{ \AA}$ ,  $c \approx 118 \text{ \AA}$ ; 2 molecules per asymmetric unit.

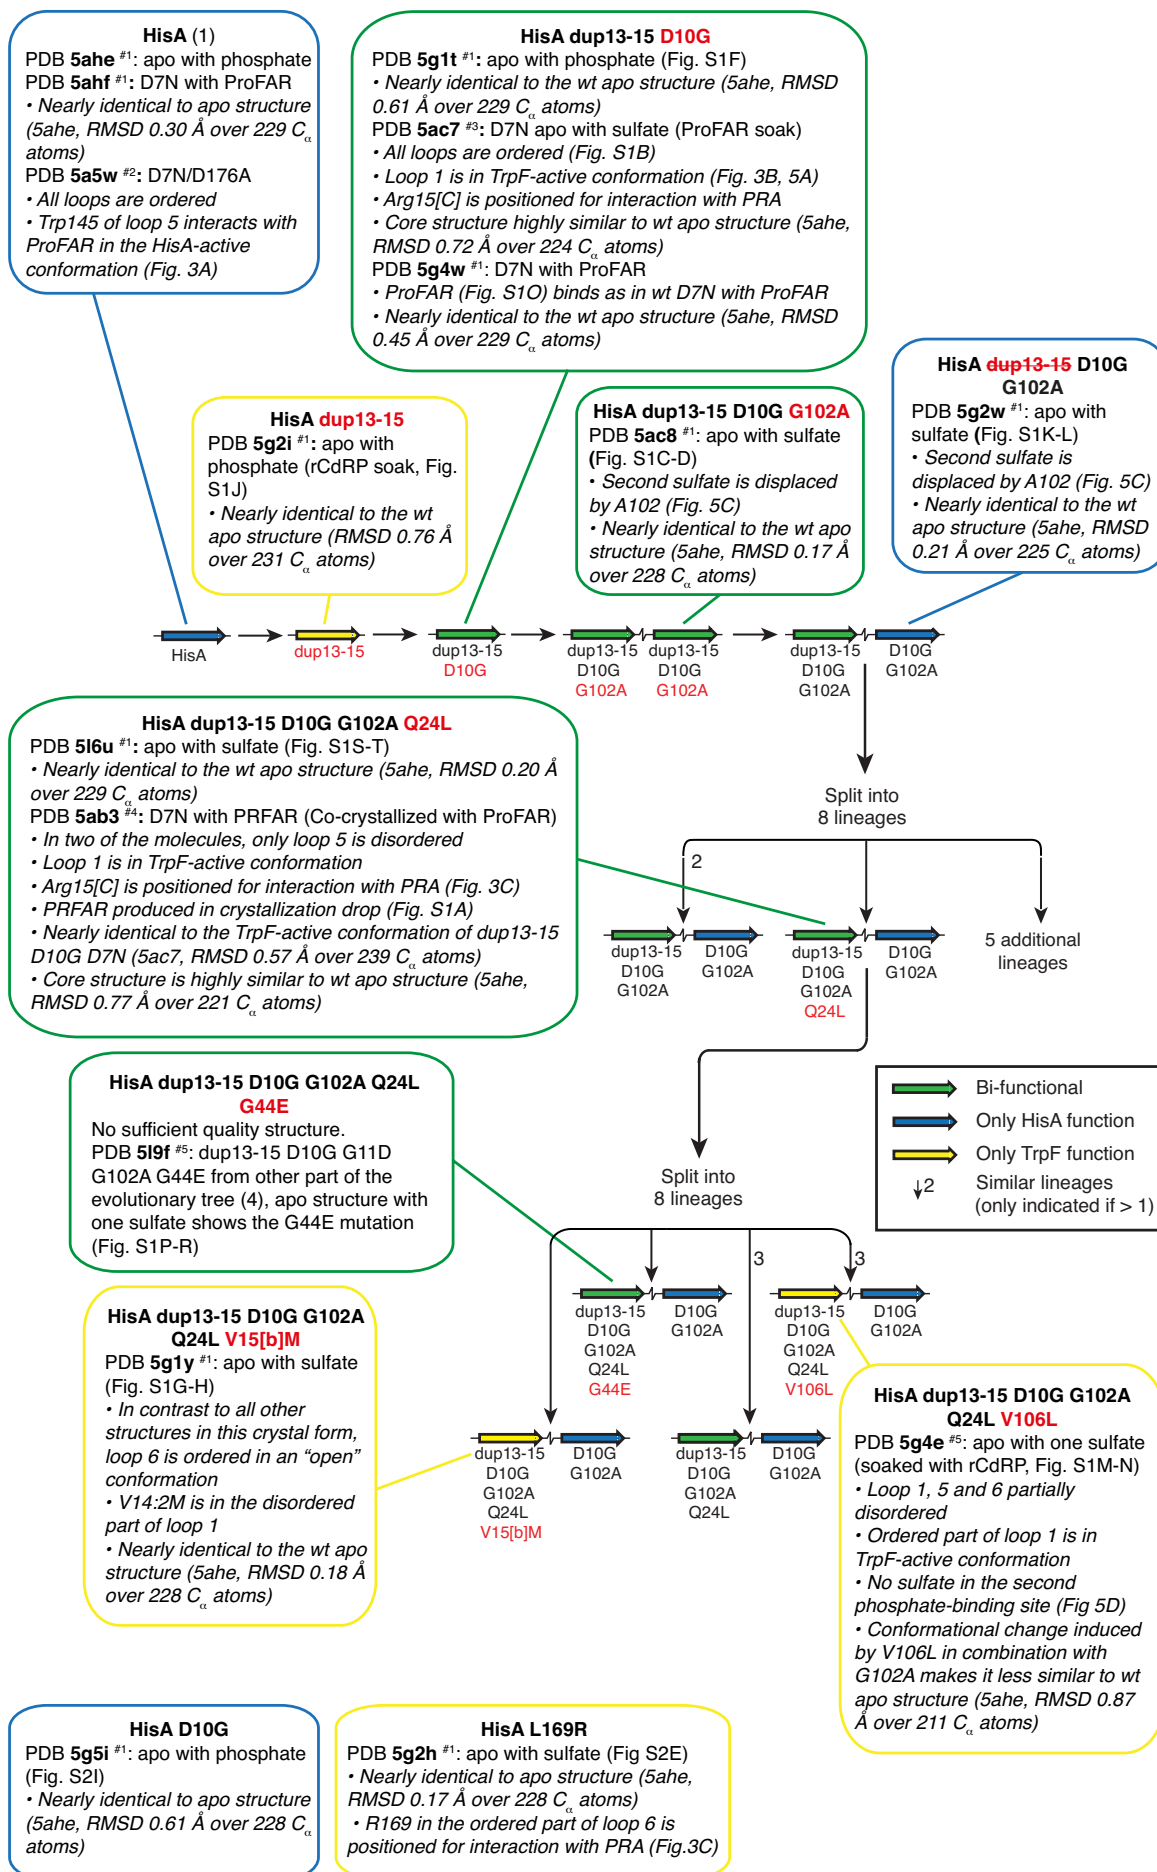

**Figure S2 (following two pages).** Electron density maps for each structure, showing ligands and mutation sites. Green mesh: *Fo-Fc* omit map contoured at 3.0  $\sigma$ ; gray mesh: *2Fo-Fc* map contoured at 1.0  $\sigma$ . (A) PRFAR from HisA(D7N/D10G/dup13-15/Q24L/G102A) that was co-crystallized with its substrate, ProFAR (converted to the product PRFAR during crystallization). (B) Mutation sites from the HisA(D7N/D10G/dup13-15) structure co-crystallized with ProFAR. (C-D) Mutation sites from the HisA(D10G/dup13-15/G102A) apo structure. (E) Mutation site from the HisA(L169R) structure soaked with rCdRP. (F) Mutation sites from the HisA(D10G/dup13-15) apo structure. (G-H) Mutation sites from the HisA(D10G/dup13-15/V15[b]M/Q24L/G102A) apo structure. (I) Mutation site from the HisA(D10G) apo structure. (J) Mutation sites from HisA (dup13-15) structure soaked with rCdRP. (K-L) Mutation sites from the HisA(D10G/G102A) apo structure. (M-N) Mutation sites from the HisA(D10G/dup13-15/Q24L/G102A/V106L) structure soaked with rCdRP. (O) ProFAR from the structure of HisA(D7N/D10G/dup13-15) soaked with ProFAR. (P-R) Mutation sites from the HisA(D10G/G11D/dup13-15/G44E/G102A) apo structure. (S-T) Mutation sites from the HisA(D10G/dup13-15/Q24L/G102A) apo structure.

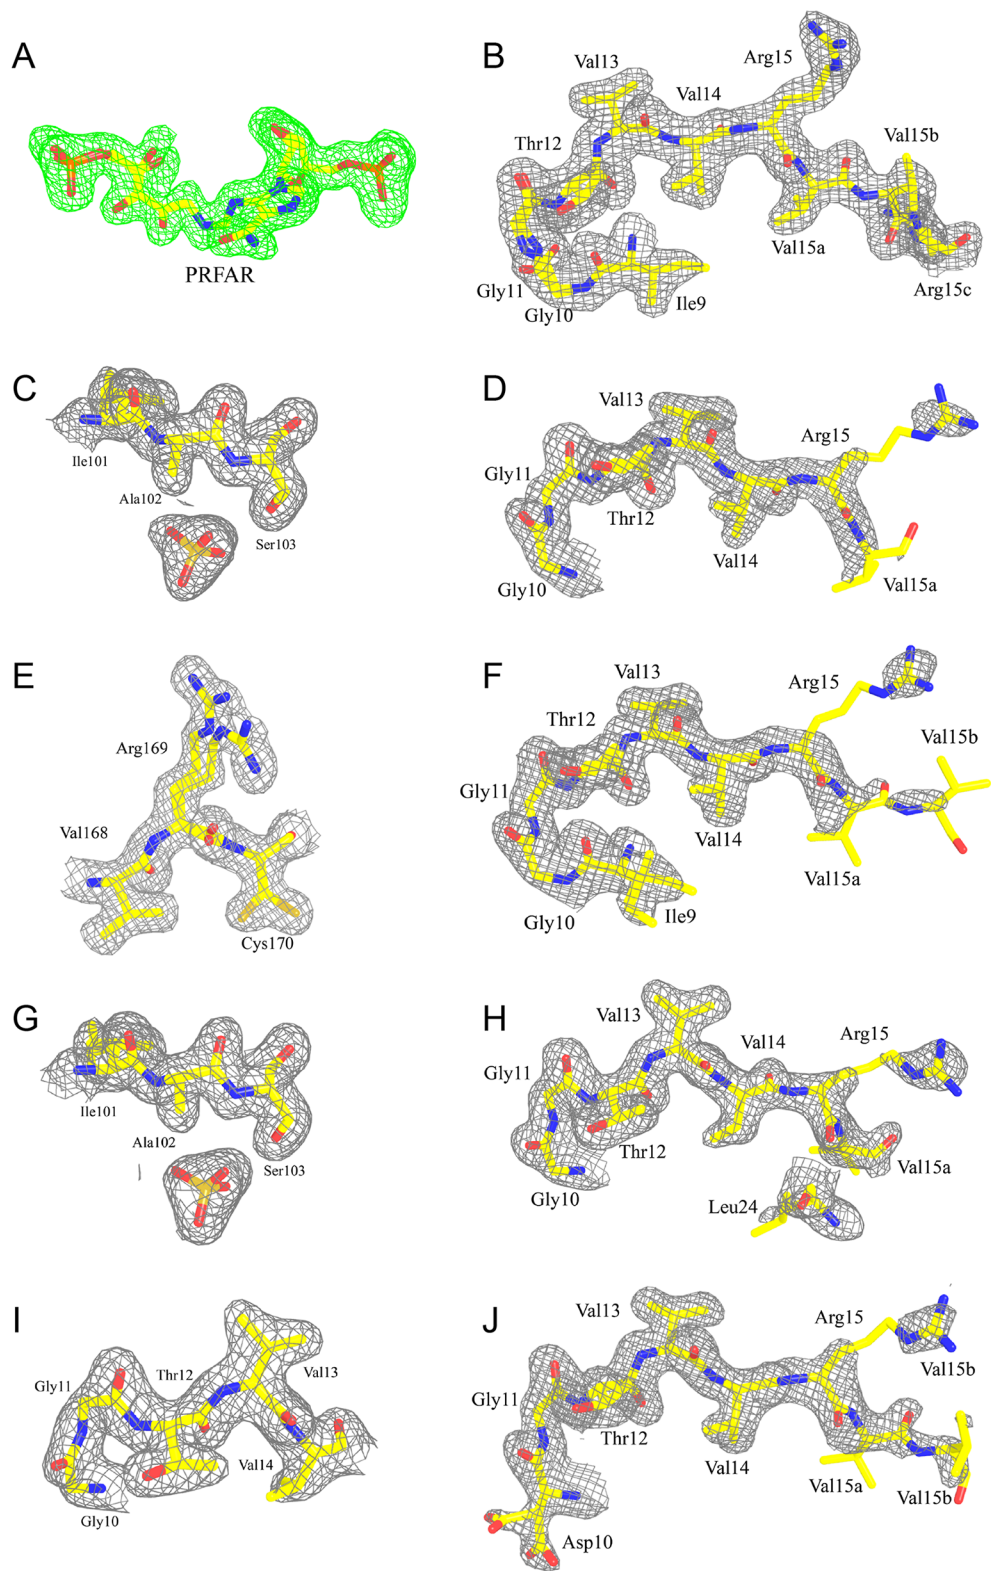

**Figure S2.** (legend on previous page.)

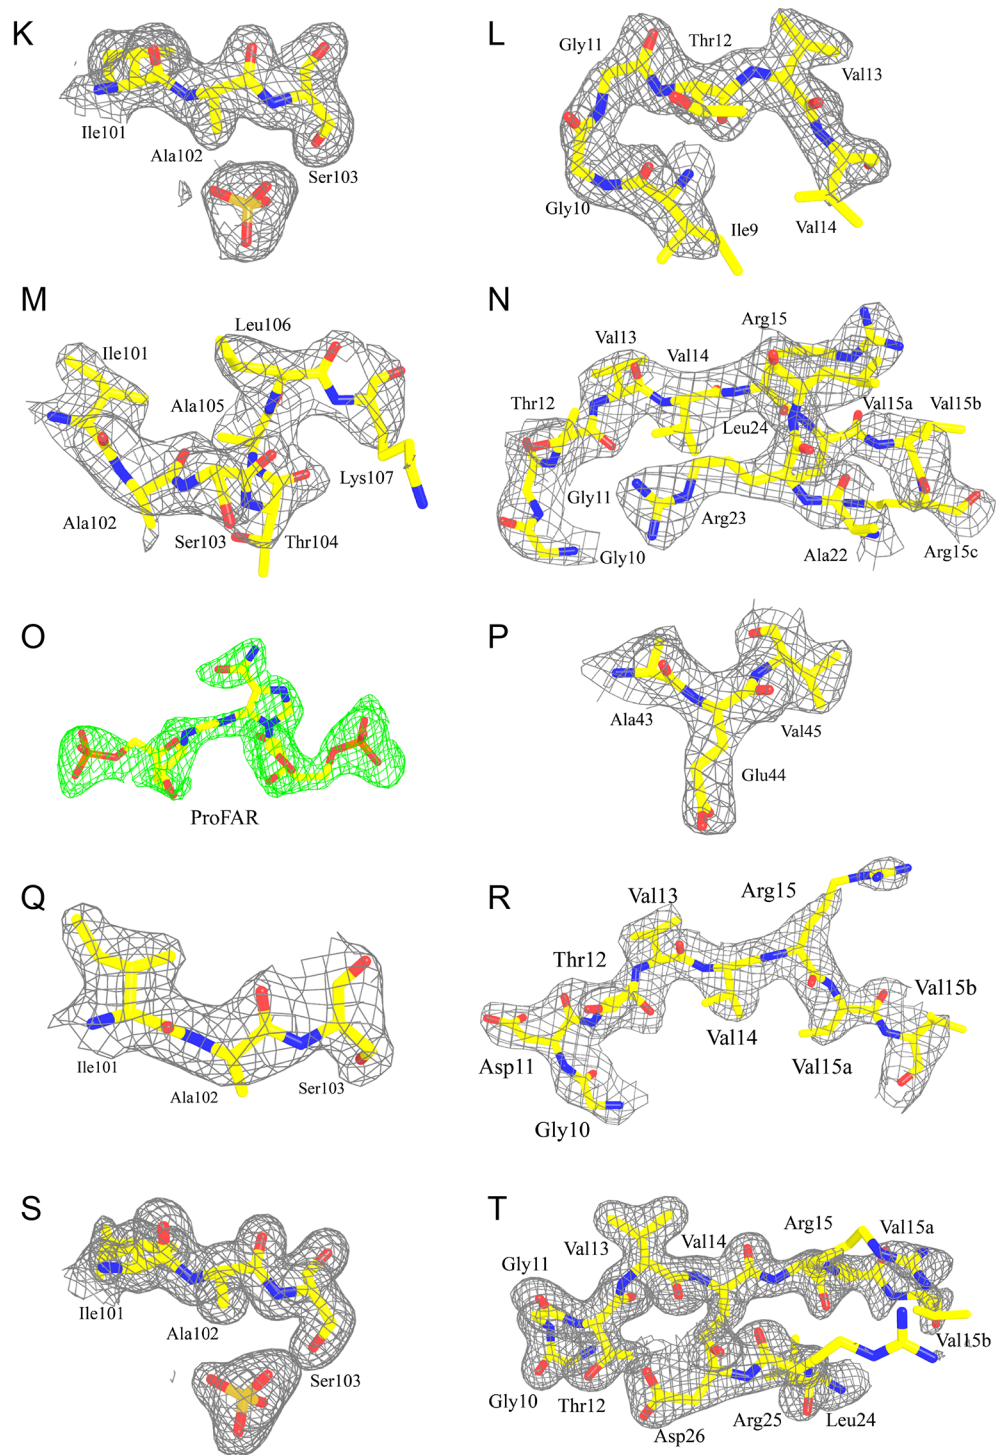

**Figure S2 (continued).**



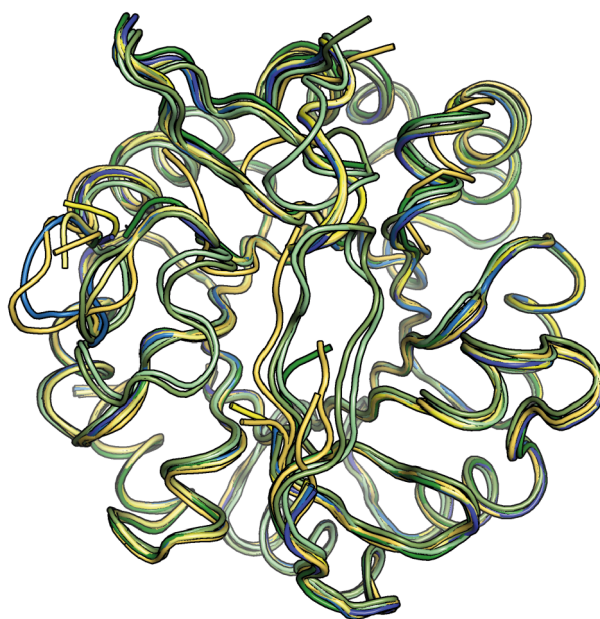

**Figure S3.** Overlay of all HisA mutant structures (listed in Table S2). HisA specialists are colored in blue, TrpF specialists in yellow and bi-functional enzymes in green. The catalytic face of the enzyme is oriented towards the viewer.

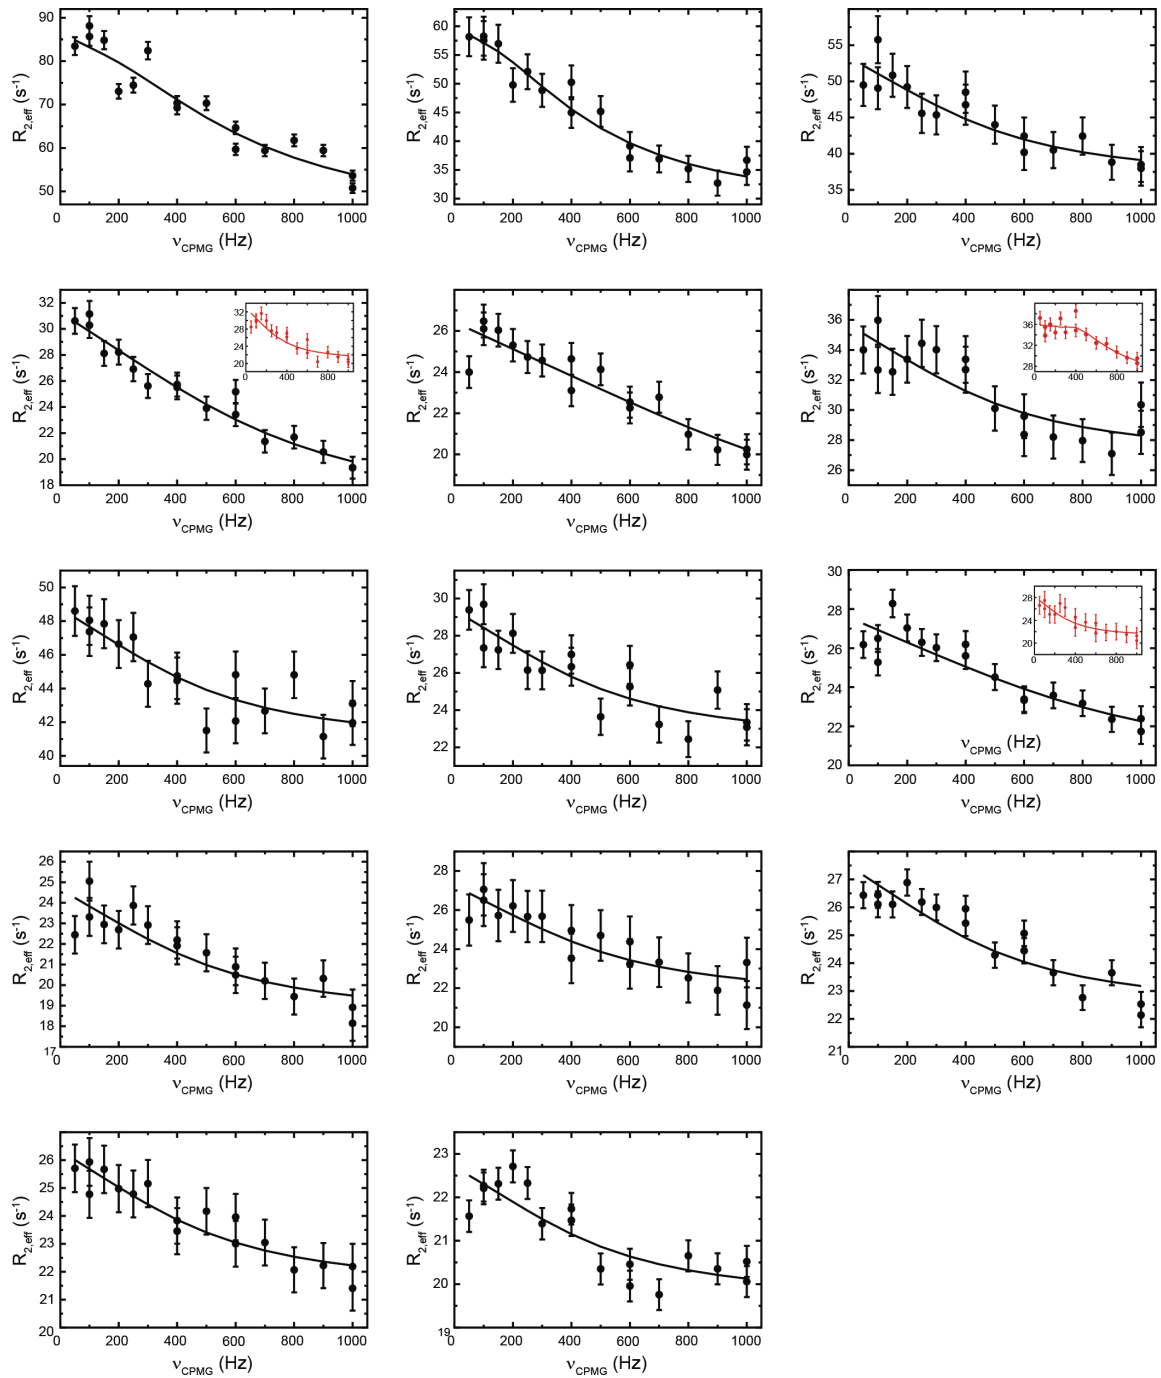

**Figure S4.** NMR  $^{15}\text{N}$  CPMG relaxation dispersions for resonances with significant conformational dynamics for HisA(dup13-15/D10G). Effective transverse relaxation rates,  $R_{2,eff}$ , at different effective fields,  $\nu_{CPMG}$ , are shown as filled circles and the lines represent the best fit to the Bloch-McConnell equations for two-site exchange. The insets show corresponding significant relaxation dispersions for HisA(dup13-15). The ordering of the panels is the same as the order of the bars in Fig. 3D.

**Table S1.** Characteristics of bi-functional HisA mutants.

| Enzyme                              | $(k_{\text{cat}}/K_M)^{\text{HisA}}$<br>( $\text{s}^{-1} \cdot \text{M}^{-1}$ ) | $(k_{\text{cat}}/K_M)^{\text{TrpF}}$<br>( $\text{s}^{-1} \cdot \text{M}^{-1}$ ) | $(k_{\text{cat}}/K_M)^{\text{HisA}}$<br>$\div$<br>$(k_{\text{cat}}/K_M)^{\text{TrpF}}$ | Growth rate as HisA (+Trp), $h^{-1}$ | Growth rate as TrpF (+His), $h^{-1}$ | Growth rate when bi-functional, $h^{-1}$ |
|-------------------------------------|---------------------------------------------------------------------------------|---------------------------------------------------------------------------------|----------------------------------------------------------------------------------------|--------------------------------------|--------------------------------------|------------------------------------------|
| HisA(dup13-15/D10G)                 | $2.8 \times 10^4$                                                               | 51                                                                              | 550                                                                                    | 0.189                                | 0.295                                | 0.143                                    |
| HisA(dup13-15/D10G/G102A)           | $9.2 \times 10^3$                                                               | 220                                                                             | 42                                                                                     | 0.270                                | 0.409                                | 0.212                                    |
| HisA(dup13-15/D10G/G102A/Q24L)      | $5.1 \times 10^3$                                                               | 260                                                                             | 20                                                                                     | 0.162                                | 0.509                                | 0.155                                    |
| HisA(dup13-15/D10G/G102A/Q24L/G44E) | $5.2 \times 10^3$                                                               | 140                                                                             | 37                                                                                     | 0.238                                | 0.534                                | 0.256                                    |
| HisA(dup13-15/D10G/G102A/G11D/G44E) | $6.7 \times 10^3$                                                               | 130                                                                             | 52                                                                                     | 0.526                                | 0.531                                | 0.423                                    |

Specificity constants are reproduced from Table 1. Growth rate data were reported previously (4).

**Table S2.** Summary of crystallographic data, refinement statistics and crystallization.

| <i>S. enterica</i> HisA variant            | D10G, dup13-15                                                        | D7N, D10G, dup13-15                           | D10G, dup13-15, G102A                               | D10G, G11D, dup13-15, G44E, G102A                                                   |
|--------------------------------------------|-----------------------------------------------------------------------|-----------------------------------------------|-----------------------------------------------------|-------------------------------------------------------------------------------------|
| <b>Data collection</b>                     |                                                                       |                                               |                                                     |                                                                                     |
| Beam line                                  | ID23-2                                                                | I02                                           | ID23-1                                              | ID23-2                                                                              |
| Detector                                   | CCD                                                                   | Pilatus 6M-F                                  | Pilatus 6M                                          | CCD                                                                                 |
| Space group                                | P6 <sub>1</sub> 22                                                    | P6 <sub>1</sub> 22                            | P6 <sub>1</sub> 22                                  | P2 <sub>1</sub> 2 <sub>1</sub> 2 <sub>1</sub>                                       |
| Unit cell parameters:                      |                                                                       |                                               |                                                     |                                                                                     |
| a, b, c (Å)                                | 87.2, 87.2, 121.9                                                     | 62.0, 62.0, 607.1                             | 86.4, 86.4, 122.0                                   | 49.2, 91.1, 117.9                                                                   |
| α, β, γ (°)                                | 90, 90, 120                                                           | 90, 90, 120                                   | 90, 90, 120                                         | 90, 90, 90                                                                          |
| Molecules per asymmetric unit              | 1                                                                     | 2                                             | 1                                                   | 2                                                                                   |
| Matthew's coefficient (Å <sup>3</sup> /Da) | 2.3                                                                   | 3.3                                           | 2.3                                                 | 2.4                                                                                 |
| Resolution range (Å)*                      | 50.00-1.70 (1.80-1.70)                                                | 50.00-1.90 (1.95-1.90)                        | 50.00-1.70 (1.73-1.70)                              | 50.00-2.59 (2.71-2.59)                                                              |
| Wavelength                                 | 0.8726                                                                | 0.9795                                        | 0.9763                                              | 0.8726                                                                              |
| Total reflections*                         | 330372 (52037)                                                        | 2137134 (138797)                              | 578357 (21225)                                      | 82382 (6916)                                                                        |
| Unique reflections*                        | 30762 (4752)                                                          | 56836 (3669)                                  | 30311 (1516)                                        | 17013 (2007)                                                                        |
| Completeness (%)*                          | 99.9 (100)                                                            | 99.8 (97.8)                                   | 99.8 (97.1)                                         | 99.7 (98.1)                                                                         |
| Redundancy*                                | 10.7 (11.0)                                                           | 37.6 (37.8)                                   | 19.1 (14.0)                                         | 4.8 (4.8)                                                                           |
| R <sub>meas</sub> (%)*                     | 4.9 (45.6)                                                            | 9.1 (115.9)                                   | 15.7 (216.5)                                        | 20.4 (79.5)                                                                         |
| I/σ(I)                                     | 30.7 (5.4)                                                            | 30.0 (4.1)                                    | 13.9 (1.3)                                          | 9.0 (2.7)                                                                           |
| Wilson B-factor (Å <sup>2</sup> )          | 29.2                                                                  | 27.8                                          | 19.6                                                | 26.5                                                                                |
| CC ½ (%)                                   | 100 (95.2)                                                            | 100 (93.6)                                    | 99.9 (40.7)                                         | 98.8 (80.0)                                                                         |
| Data scaling software                      | XDS                                                                   | Aimless                                       | Aimless                                             | Aimless                                                                             |
| <b>Refinement</b>                          |                                                                       |                                               |                                                     |                                                                                     |
| Resolution range                           | 28.55-1.70                                                            | 49.10-1.90                                    | 47.30-1.70                                          | 49.50-2.59                                                                          |
| Reflection / test set                      | 30762 / 1539                                                          | 56576 / 2868                                  | 30248 / 1529                                        | 16926 / 856                                                                         |
| Number of non-hydrogen atoms               | 2007                                                                  | 3981                                          | 1905                                                | 3420                                                                                |
| macromolecules                             | 1829                                                                  | 3720                                          | 1779                                                | 3361                                                                                |
| ligands                                    | 30                                                                    | 28                                            | 15                                                  | 12                                                                                  |
| water                                      | 147                                                                   | 233                                           | 109                                                 | 47                                                                                  |
| R <sub>work</sub> /R <sub>free</sub> (%)   | 17.2 / 20.0                                                           | 18.6/21.4                                     | 19.6/20.9                                           | 22.2/28.9                                                                           |
| Average B-factors:                         |                                                                       |                                               |                                                     |                                                                                     |
| overall                                    | 28.2                                                                  | 41.9                                          | 27.9                                                | 32.0                                                                                |
| macromolecules                             | 27.4                                                                  | 41.9                                          | 27.5                                                | 32.1                                                                                |
| ligands                                    | 41.4                                                                  | 59.6                                          | 44.7                                                | 42.5                                                                                |
| water                                      | 35.3                                                                  | 40.4                                          | 30.9                                                | 25.6                                                                                |
| RMSD from ideal bond lengths               | 0.007                                                                 | 0.007                                         | 0.008                                               | 0.009                                                                               |
| RMSD from ideal bond angles                | 1.06                                                                  | 1.10                                          | 1.15                                                | 1.27                                                                                |
| Ramachandran plot:                         |                                                                       |                                               |                                                     |                                                                                     |
| Preferred (%)                              | 99                                                                    | 98                                            | 98                                                  | 97                                                                                  |
| Allowed (%)                                | 1                                                                     | 2                                             | 2                                                   | 3                                                                                   |
| Outliers (%)                               | 0                                                                     | 0                                             | 0                                                   | 0                                                                                   |
| <b>Model</b>                               |                                                                       |                                               |                                                     |                                                                                     |
| Protein residues <sup>#</sup>              | 1-15[b], 24-174, 183-244                                              | ChainA: 1-243; ChainB 1-244                   | 1-15[a], 24-179, 184-244                            | ChainA:1-15[b], 23-142, 151-174, 183-244; ChainB: 1-15[b], 23-141, 150-173, 183-244 |
| Ligands                                    | HEPES, phosphate                                                      | Sulfate                                       | Sulfate                                             | Sulfate                                                                             |
| Crystallization                            | 0.1 M HEPES pH 7.5, 0.8 M sodium phosphate, 0.8 M potassium phosphate | 2.0 M ammonium sulfate, 0.1 M Bis-Tris pH 5.5 | 2.0 M ammonium sulfate, 0.1 M sodium acetate pH 4.6 | 0.2 M lithium sulfate, 0.1 M sodium acetate pH 4.5, 30% w/v PEG8000                 |
| Ligand addition                            |                                                                       | Co-crystallized with ProFAR                   |                                                     |                                                                                     |
| Comments                                   | —                                                                     | —                                             | —                                                   | —                                                                                   |
| <b>PDB accession number</b>                | <b>5G1T</b>                                                           | <b>5AC7</b>                                   | <b>5AC8</b>                                         | <b>5L9F</b>                                                                         |

\* Values in parentheses refer to the highest resolution shell.

<sup>#</sup> Residues 10-30 represent loop 1, 129-152 loop 5 and 172-183 loop 6.

| <i>S. enterica</i> HisA variant            | D7N, D10G, dup13-15, Q24L, G102A                                                                                       | D10G, dup13-15, V15[b]M, Q24L, G102A                                 | D10G, dup13-15, Q24L, G102A                                          | D10G, dup13-15, Q24L, G102A, V106L                                                           |
|--------------------------------------------|------------------------------------------------------------------------------------------------------------------------|----------------------------------------------------------------------|----------------------------------------------------------------------|----------------------------------------------------------------------------------------------|
| <b>Data collection</b>                     |                                                                                                                        |                                                                      |                                                                      |                                                                                              |
| Beam line                                  | I02                                                                                                                    | ID14-4                                                               | P14                                                                  | ID23-2                                                                                       |
| Detector                                   | Pilatus 6M-F                                                                                                           | CCD                                                                  | Pilatus                                                              | CCD                                                                                          |
| Space group                                | P3221                                                                                                                  | P6122                                                                | P6122                                                                | P212121                                                                                      |
| Unit cell parameters:                      |                                                                                                                        |                                                                      |                                                                      |                                                                                              |
| a, b, c (Å)                                | 61.2, 61.2, 391.9                                                                                                      | 86.0, 86.0, 122.2                                                    | 85.9, 85.9, 121.0                                                    | 48.8, 88.8, 117.8                                                                            |
| $\alpha, \beta, \gamma$ (°)                | 90, 90, 120                                                                                                            | 90, 90, 120                                                          | 90, 90, 120                                                          | 90, 90, 90                                                                                   |
| Molecules per asymmetric unit              | 3                                                                                                                      | 1                                                                    | 1                                                                    | 2                                                                                            |
| Matthew's coefficient (Å <sup>3</sup> /Da) | 2.8                                                                                                                    | 2.3                                                                  | 2.4                                                                  | 2.3                                                                                          |
| Resolution range (Å)*                      | 50.00-1.80 (1.84-1.80)                                                                                                 | 50.00-1.80 (1.84-1.80)                                               | 74.43-1.60 (1.70-1.60)                                               | 50.00-2.40 (2.50-2.40)                                                                       |
| Wavelength                                 | 0.9795                                                                                                                 | 0.9763                                                               | 0.9763                                                               | 0.8726                                                                                       |
| Total reflections*                         | 755447 (41474)                                                                                                         | 337881 (11073)                                                       | 1359688 (223319)                                                     | 81952 (7078)                                                                                 |
| Unique reflections*                        | 80382 (4268)                                                                                                           | 25362 (1367)                                                         | 35399 (5723)                                                         | 19789 (791)                                                                                  |
| Completeness (%)                           | 99.6 (94.8)                                                                                                            | 99.5 (93.2)                                                          | 99.8 (99.5)                                                          | 95.5 (76.9)                                                                                  |
| Redundancy*                                | 9.4 (9.7)                                                                                                              | 13.3 (8.1)                                                           | 38.4 (38.8)                                                          | 4.1 (8.9)                                                                                    |
| R <sub>meas</sub> (%)*                     | 7.2 (95.9)                                                                                                             | 9.9 (109.9)                                                          | 8.2 (162.4)                                                          | 16.8 (101.1)                                                                                 |
| I/ $\sigma$ (I)*                           | 15.7 (2.4)                                                                                                             | 19.0 (2.0)                                                           | 36.1 (2.77)                                                          | 9.9 (1.6)                                                                                    |
| Wilson B-factor (Å <sup>2</sup> )          | 27.9                                                                                                                   | 17.0                                                                 | 30.5                                                                 | 44.3                                                                                         |
| CC ½ (%)                                   | 99.9 (88.0)                                                                                                            | 99.9 (64.5)                                                          | 100 (80.7)                                                           | 99.5 (65.6)                                                                                  |
| Data scaling software                      | Aimless                                                                                                                | Aimless                                                              | XDS                                                                  | Aimless                                                                                      |
| <b>Refinement</b>                          |                                                                                                                        |                                                                      |                                                                      |                                                                                              |
| Resolution range                           | 49.10-1.80                                                                                                             | 47.25 - 1.80                                                         | 74.43-1.60                                                           | 45.10-2.65                                                                                   |
| Reflection / test set                      | 80205 / 4024                                                                                                           | 25335 / 1291                                                         | 35398 / 1769                                                         | 15276 / 790                                                                                  |
| Number of non-hydrogen atoms               |                                                                                                                        |                                                                      |                                                                      |                                                                                              |
| macromolecules                             | 6206                                                                                                                   | 1962                                                                 | 2015                                                                 | 3230                                                                                         |
| ligands                                    | 5521                                                                                                                   | 1823                                                                 | 1886                                                                 | 3176                                                                                         |
| water                                      | 152                                                                                                                    | 33                                                                   | 15                                                                   | 28                                                                                           |
| water                                      | 532                                                                                                                    | 105                                                                  | 114                                                                  | 26                                                                                           |
| R <sub>work</sub> /R <sub>free</sub> (%)   | 17.2/20.6                                                                                                              | 16.6/21.0                                                            | 15.5/18.9                                                            | 24.0/29.9                                                                                    |
| Average B-factors:                         |                                                                                                                        |                                                                      |                                                                      |                                                                                              |
| overall                                    | 40.3                                                                                                                   | 28.8                                                                 | 31.2                                                                 | 45.6                                                                                         |
| macromolecules                             | 40.2                                                                                                                   | 28.1                                                                 | 30.6                                                                 | 45.7                                                                                         |
| ligands                                    | 34.3                                                                                                                   | 47.5                                                                 | 52.8                                                                 | 49.0                                                                                         |
| water                                      | 42.4                                                                                                                   | 34.7                                                                 | 38.6                                                                 | 37.8                                                                                         |
| RMSD from ideal bond lengths               | 0.007                                                                                                                  | 0.037                                                                | 0.027                                                                | 0.004                                                                                        |
| RMSD from ideal bond angles                | 1.08                                                                                                                   | 1.81                                                                 | 2.55                                                                 | 0.760                                                                                        |
| Ramachandran plot:                         |                                                                                                                        |                                                                      |                                                                      |                                                                                              |
| Preferred (%)                              | 97                                                                                                                     | 98                                                                   | 98                                                                   | 96                                                                                           |
| Allowed (%)                                | 3                                                                                                                      | 2                                                                    | 2                                                                    | 3.75                                                                                         |
| Outliers (%)                               | 0                                                                                                                      | 0                                                                    | 0                                                                    | 0.25                                                                                         |
| <b>Model</b>                               |                                                                                                                        |                                                                      |                                                                      |                                                                                              |
| Protein residues <sup>#</sup>              | ChainA: 1-142, 149-244; ChainB: 1-16, 19-141, 150-244; ChainC: 1-142, 147-244                                          | 1-15[a], 24-174, 178-180, 182-244                                    | 1-15B, 22-174, 180-181, 183-244                                      | Chain A: 1-17, 21-129, 138-141, 149-172, 182-244; Chain B: 1-15[a], 25-129, 151-172, 182-244 |
| Ligands                                    | PRFAR                                                                                                                  | Sulfate, glycerol                                                    | Sulfate                                                              |                                                                                              |
| Crystallization                            | 0.1 M MOPS/HEPES-Na pH7.5, 0.03 M MgCl <sub>2</sub> , 0.03 M CaCl <sub>2</sub> , 10% w/v PEG20000, 20% v/v PEG MME 550 | 0.2 M ammonium sulfate, 0.1 M sodium acetate pH 4.6, 25% w/v PEG4000 | 0.2 M ammonium sulfate, 0.1 M sodium acetate pH 4.8, 25% w/v PEG4000 | 0.18 M ammonium acetate, 0.09 M sodium acetate, pH 5.15, 27% w/v PEG4000                     |
| Ligand addition                            | Co-crystallized with ProFAR                                                                                            |                                                                      |                                                                      | Soaked with rCdRP                                                                            |
| Comments                                   | —                                                                                                                      | —                                                                    | —                                                                    | 138-141 in chain A built as polyalanine                                                      |
| <b>PDB accession number</b>                | <b>5AB3</b>                                                                                                            | <b>5G1Y</b>                                                          | <b>5L6U</b>                                                          | <b>5G4E</b>                                                                                  |

\* Values in parentheses refer to the highest resolution shell.

<sup>#</sup> Residues 10-30 represent loop 1, 129-152 loop 5 and 172-183 loop 6.

| <i>S. enterica</i> HisA variant            | D7N, D10G, dup13-15                                                                                           | dup13-15                                                                                  | D10G, G102A                                                        | L169R                                                                                                        |
|--------------------------------------------|---------------------------------------------------------------------------------------------------------------|-------------------------------------------------------------------------------------------|--------------------------------------------------------------------|--------------------------------------------------------------------------------------------------------------|
| <b>Data collection</b>                     |                                                                                                               |                                                                                           |                                                                    |                                                                                                              |
| Beam line                                  | ID23-2                                                                                                        | BM30                                                                                      | ID14-4                                                             | IO2                                                                                                          |
| Detector                                   | Pilatus                                                                                                       | ADSC                                                                                      | ADSC                                                               | Pilatus M6                                                                                                   |
| Space group                                | P6122                                                                                                         | P6122                                                                                     | P6122                                                              | P6122                                                                                                        |
| Unit cell parameters:                      |                                                                                                               |                                                                                           |                                                                    |                                                                                                              |
| a, b, c (Å)                                | 87.0, 87.0, 120.5                                                                                             | 86.6, 86.6, 121.4                                                                         | 86.0, 86.0, 121.6                                                  | 86.0, 86.0, 122.7                                                                                            |
| $\alpha, \beta, \gamma$ (°)                | 90, 90, 120                                                                                                   | 90, 90, 120                                                                               | 90, 90, 120                                                        | 90, 90, 120                                                                                                  |
| Molecules per asymmetric unit              | 1                                                                                                             | 1                                                                                         | 1                                                                  | 1                                                                                                            |
| Matthew's coefficient (Å <sup>3</sup> /Da) | 2.4                                                                                                           | 2.4                                                                                       | 2.4                                                                | 2.4                                                                                                          |
| Resolution range (Å)*                      | 50.00-2.30 (2.44-2.30)                                                                                        | 50.00-1.60 (1.70-1.60)                                                                    | 50.00-2.10 (2.23-2.10)                                             | 50.00-1.90 (2.02-1.90)                                                                                       |
| Wavelength                                 | 0.8726                                                                                                        | 0.9797                                                                                    | 0.9763                                                             | 0.9795                                                                                                       |
| Total reflections*                         | 170686 (27112)                                                                                                | 754966 (123820)                                                                           | 277592 (44157)                                                     | 314134 (49510)                                                                                               |
| Unique reflections*                        | 22042 (3547)                                                                                                  | 35938 (5789)                                                                              | 16100 (2515)                                                       | 40024 (6473)                                                                                                 |
| Completeness (%)*                          | 97.3 (97.2)                                                                                                   | 99.4 (98.4)                                                                               | 99.8 (99.4)                                                        | 100 (99.8)                                                                                                   |
| Redundancy*                                | 7.7 (7.6)                                                                                                     | 21.0 (21.4)                                                                               | 17.2 (17.6)                                                        | 7.8 (7.6)                                                                                                    |
| R <sub>meas</sub> (%)*                     | 26.6 (117.8)                                                                                                  | 5.5 (62.4)                                                                                | 9.0 (62.2)                                                         | 17.8 (75.8)                                                                                                  |
| I/σ(I)                                     | 8.5 (1.8)                                                                                                     | 42.1 (6.1)                                                                                | 29.2 (5.3)                                                         | 9.2 (2.3)                                                                                                    |
| Wilson B-factor (Å <sup>2</sup> )          | 34.7                                                                                                          | 26.2                                                                                      | 35.8                                                               | 25.7                                                                                                         |
| CC ½ (%)                                   | 99.1 (57.8)                                                                                                   | 100 (95.7)                                                                                | 99.9 (93.7)                                                        | 99.5 (79.9)                                                                                                  |
| Data scaling software                      | XDS                                                                                                           | XDS                                                                                       | XDS                                                                | XDS                                                                                                          |
| <b>Refinement</b>                          |                                                                                                               |                                                                                           |                                                                    |                                                                                                              |
| Resolution range                           | 47.00-2.30                                                                                                    | 47.18-1.60                                                                                | 47.10-2.10                                                         | 47.40-1.90                                                                                                   |
| Reflection / test set                      | 22041 / 1100                                                                                                  | 35934 / 1797                                                                              | 16099 / 805                                                        | 40017 / 1982                                                                                                 |
| Number of non-hydrogen atoms               | 1865                                                                                                          | 1952                                                                                      | 1828                                                               | 1987                                                                                                         |
| macromolecules                             | 1747                                                                                                          | 1809                                                                                      | 1766                                                               | 1827                                                                                                         |
| ligands                                    | 49                                                                                                            | 16                                                                                        | 10                                                                 | 39                                                                                                           |
| water                                      | 69                                                                                                            | 125                                                                                       | 52                                                                 | 121                                                                                                          |
| R <sub>work</sub> /R <sub>free</sub> (%)   | 19.9/26.4                                                                                                     | 18.3/20.6                                                                                 | 16.8/22.0                                                          | 16.9/21.2                                                                                                    |
| Average B-factors:                         |                                                                                                               |                                                                                           |                                                                    |                                                                                                              |
| overall                                    | 30.1                                                                                                          | 25.4                                                                                      | 36.6                                                               | 25.8                                                                                                         |
| macromolecules                             | 29.8                                                                                                          | 24.8                                                                                      | 36.4                                                               | 25.1                                                                                                         |
| ligands                                    | 38.5                                                                                                          | 28.3                                                                                      | 57.7                                                               | 37.8                                                                                                         |
| water                                      | 31.6                                                                                                          | 32.8                                                                                      | 38.5                                                               | 32.6                                                                                                         |
| RMSD from ideal bond lengths               | 0.004                                                                                                         | 0.006                                                                                     | 0.009                                                              | 0.010                                                                                                        |
| RMSD from ideal bond angles                | 0.792                                                                                                         | 1.06                                                                                      | 1.07                                                               | 1.19                                                                                                         |
| Ramachandran plot:                         |                                                                                                               |                                                                                           |                                                                    |                                                                                                              |
| Preferred (%)                              | 97                                                                                                            | 99                                                                                        | 98                                                                 | 98                                                                                                           |
| Allowed (%)                                | 3                                                                                                             | 1                                                                                         | 2                                                                  | 2                                                                                                            |
| Outliers (%)                               | 0                                                                                                             | 0                                                                                         | 0                                                                  | 0                                                                                                            |
| <b>Model</b>                               |                                                                                                               |                                                                                           |                                                                    |                                                                                                              |
| Protein residues <sup>#</sup>              | 1-15[a], 24-174, 180-244                                                                                      | 1-15[b], 24-174, 182-244                                                                  | 1-14, 26-174, 183-244                                              | 1-16, 24-175, 178-244                                                                                        |
| Ligands                                    | ProFAR                                                                                                        | Phosphate                                                                                 | Sulfate                                                            | Sulfate, glycerol                                                                                            |
| Crystallization                            | 2 M ammonium phosphate monobasic, 0.1 M Tris pH 8.5                                                           | 0.8 M sodium phosphate monobasic, 0.8 M potassium phosphate monobasic, 0.1 M HEPES pH 7.5 | 0.2 M ammonium acetate, 0.1 M sodium acetate, pH 5.15, 20% PEG4000 | 2.3 M ammonium sulfate, 0.1 M sodium acetate pH 4.6                                                          |
| Ligand addition                            | Soaked with ProFAR in cryo buffer: 50 mM HEPES sodium pH 7, 150 mM sodium chloride, 30% PEG4000, 15% glycerol | Soaked with rCDRP                                                                         |                                                                    | Soaked with rCDRP in cryo buffer: 50 mM HEPES sodium pH 7, 150 mM sodium chloride, 30% PEG4000, 15% glycerol |
| Comments                                   | —                                                                                                             | —                                                                                         | —                                                                  | —                                                                                                            |
| <b>PDB accession number</b>                | <b>5G4W</b>                                                                                                   | <b>5G2I</b>                                                                               | <b>5G2W</b>                                                        | <b>5G2H</b>                                                                                                  |

\* Values in parentheses refer to the highest resolution shell.

<sup>#</sup> Residues 10-30 represent loop 1, 129-152 loop 5 and 172-183 loop 6.

| <b><i>S. enterica</i> HisA variant</b>     | <b>D10G</b>                                                                               |
|--------------------------------------------|-------------------------------------------------------------------------------------------|
| <b>Data collection</b>                     |                                                                                           |
| Beam line                                  | ID14-4                                                                                    |
| Detector                                   | CCD                                                                                       |
| Space group                                | P6122                                                                                     |
| Unit cell parameters:                      |                                                                                           |
| a, b, c (Å)                                | 85.9, 85.9, 121.4                                                                         |
| $\alpha, \beta, \gamma$ (°)                | 90, 90, 120                                                                               |
| Molecules per asymmetric unit              | 1                                                                                         |
| Matthew's coefficient (Å <sup>3</sup> /Da) | 2.4                                                                                       |
| Resolution range (Å)*                      | 50.00-2.00 (2.10-2.00)                                                                    |
| Wavelength                                 | 0.9164                                                                                    |
| Total reflections*                         | 216796 (28674)                                                                            |
| Unique reflections*                        | 18459 (2409)                                                                              |
| Completeness (%)*                          | 99.7 (98.2)                                                                               |
| Redundancy*                                | 11.7 (11.7)                                                                               |
| R <sub>meas</sub> (%)*                     | 12.2 (85.6)                                                                               |
| I/ $\sigma$ (I)                            | 17.5 (3.4)                                                                                |
| Wilson B-factor (Å <sup>2</sup> )          | 32.5                                                                                      |
| CC ½ (%)                                   | 99.9 (87.8)                                                                               |
| Data scaling software                      | XDS                                                                                       |
| <b>Refinement</b>                          |                                                                                           |
| Resolution range                           | 47.00-2.00                                                                                |
| Reflection / test set                      | 18458 / 923                                                                               |
| Number of non-hydrogen atoms               | 1866                                                                                      |
| macromolecules                             | 1755                                                                                      |
| ligands                                    | 30                                                                                        |
| water                                      | 81                                                                                        |
| R <sub>work</sub> /R <sub>free</sub> (%)   | 17.1/21.0                                                                                 |
| Average B-factors:                         |                                                                                           |
| overall                                    | 32.1                                                                                      |
| macromolecules                             | 31.6                                                                                      |
| ligands                                    | 47.3                                                                                      |
| water                                      | 35.9                                                                                      |
| RMSD from ideal bond lengths               | 0.008                                                                                     |
| RMSD from ideal bond angles                | 1.13                                                                                      |
| Ramachandran plot:                         |                                                                                           |
| Preferred (%)                              | 98                                                                                        |
| Allowed (%)                                | 2                                                                                         |
| Outliers (%)                               | 0                                                                                         |
| <b>Model</b>                               |                                                                                           |
| Protein residues <sup>#</sup>              | 1-15, 24-175, 184-244                                                                     |
| Ligands                                    | Phosphate                                                                                 |
| Crystallization                            | 0.8 M sodium phosphate monobasic, 0.8 M potassium phosphate monobasic, 0.1 M HEPES pH 7.5 |
| Ligand addition                            |                                                                                           |
| Comments                                   | —                                                                                         |
| <b>PDB accession number</b>                | <b>5G5I</b>                                                                               |

\* Values in parentheses refer to the highest resolution shell.

<sup>#</sup> Residues 10-30 represent loop 1, 129-152 loop 5 and 172-183 loop 6.

## SI References

1. Söderholm A, et al. (2015) Two-step ligand binding in a ( $\beta\alpha$ )<sub>8</sub> barrel enzyme: substrate-bound structures shed new light on the catalytic cycle of HisA. *J Biol Chem* 290:24657-24668.
2. Patrick WM, Matsumura I (2008) A study in molecular contingency: glutamine phosphoribosylpyrophosphate amidotransferase is a promiscuous and evolvable phosphoribosylanthranilate isomerase. *J Mol Biol* 377:323-336.
3. Gerth ML, Nigon LV, Patrick WM (2012) Characterization of the indole-3-glycerol phosphate synthase from *Pseudomonas aeruginosa* PAO1. *Protein J* 31:359-365.
4. Näsval J, Sun L, Roth JR, Andersson DI (2012) Real-time evolution of new genes by innovation, amplification, and divergence. *Science* 338:384-387.
5. Knöppel A, Näsval J, Andersson DI (2016) Compensating the fitness costs of synonymous mutations. *Mol Biol Evol* 33:1461-1477.
6. Kabsch W (2010) Xds. *Acta Crystallogr D Biol Crystallogr* 66:125-132.
7. Winn MD, et al. (2011) Overview of the CCP4 suite and current developments. *Acta Crystallogr D Biol Crystallogr* 67:235-242.
8. McCoy AJ, et al. (2007) Phaser crystallographic software. *J Appl Crystallogr* 40:658-674.
9. Emsley P, Lohkamp B, Scott WG, Cowtan K (2010) Features and development of Coot. *Acta Crystallogr D Biol Crystallogr* 66:486-501.
10. Afonine PV, et al. (2012) Towards automated crystallographic structure refinement with phenix.refine. *Acta Crystallogr D Biol Crystallogr* 68:352-367.
11. Carr HY, Purcell EM (1954) Effects of diffusion on free precession in nuclear magnetic resonance experiments. *Phys Rev* 94:630-638.
12. Meiboom S, Gill D (1958) Modified spin-echo method for measuring nuclear relaxation times. *Rev Sci Instrum* 29:688-691.
13. Delaglio F, et al. (1995) NMRPipe - a multidimensional spectral processing system based on UNIX pipes. *J Biomol NMR* 6:277-293.
14. Ahlner A, Carlsson M, Jonsson BH, Lundström P (2013) PINT: a software for integration of peak volumes and extraction of relaxation rates. *J Biomol NMR* 56:191-202.
15. McConnell HM (1958) Reaction rates by nuclear magnetic resonance. *J Chem Phys* 28:430-431.



16. Jones TA, Zou J-Y, Cowan SW, Kjeldgaard M (1991) Improved methods for building protein models in electron density maps and the location of errors in these models. *Acta Crystallographica A* 47:110-119.
17. Kleywegt GJ, Jones TA (1997) Detecting folding motifs and similarities in protein structures. *Methods Enzymol* 277:525-545.
